# Supplementary material for: Effect of education on attitude towards domestic violence in Nigeria: an exploration using Propensity score methodology
Source: Research Square preprint supplement (doi:10.21203/rs.3.rs-211196/v1), 2021-02-10
Supplement: Supplementary file 1 [file a6c4c947167703e7228d98e2.docx]

**Additional table 1: Selection bias (men)**

| **Age ref( 15 -19)** | **Level of Education** | **RRR** | **95% CI** | |
| --- | --- | --- | --- | --- |
|  |  |  | **lower** | **upper** |
| 20-24 | None |  |  |  |
|  | Pry | 1.04 | 0.83 | 1.29 |
|  | Secondary | 1.08 | 0.89 | 1.31 |
|  | Tertiary | 10.29 | 7.67 | 13.8 |
| 25-29 | None |  |  |  |
|  | Pry | 0.93 | 0.76 | 1.15 |
|  | Secondary | 0.63 | 0.53 | 0.76 |
|  | Tertiary | 10.67 | 8.03 | 14.18 |
| 30-34 | None |  |  |  |
|  | Pry | 1.05 | 0.86 | 1.28 |
|  | Secondary | 0.5 | 0.42 | 0.61 |
|  | Tertiary | 8.91 | 6.72 | 11.83 |
| 35-39 | None |  |  |  |
|  | Pry | 1.15 | 0.94 | 1.4 |
|  | Secondary | 0.43 | 0.35 | 0.51 |
|  | Tertiary | 7.23 | 5.43 | 9.61 |
| 40-44 | None |  |  |  |
|  | Pry | 1.21 | 1 | 1.47 |
|  | Secondary | 0.33 | 0.28 | 0.4 |
|  | Tertiary | 5.17 | 3.87 | 6.91 |
| 45-49 | None |  |  |  |
|  | Pry | 1.07 | 0.87 | 1.31 |
|  | Secondary | 0.25 | 0.2 | 0.3 |
|  | Tertiary | 4.14 | 3.06 | 5.59 |
| **Residence base(urban)** |  |  |  |  |
| Rural | None |  |  |  |
|  | Pry | 0.61 | 0.51 | 0.74 |
|  | Secondary | 0.2 | 0.17 | 0.23 |
|  | Tertiary | 0.09 | 0.08 | 0.11 |
| **Wealth index base (Poor)** |  |  |  |  |
| Average | None |  |  |  |
|  | Pry | 2.76 | 2.3 | 3.3 |
|  | Secondary | 13.11 | 10.94 | 15.7 |
|  | Tertiary | 3.34 | 2.25 | 4.32 |
| Rich | None |  |  |  |
|  | Pry | 8.85 | 5.49 | 14.27 |
|  | Secondary | 1.44 | 0.51 | 2.48 |
|  | Tertiary | 14.06 | 8.2 | 24.53 |
| **Geopolitical zone base (North central)** |  |  |  |  |
| North east | None |  |  |  |
|  | Pry | 0.64 | 0.51 | 0.81 |
|  | Secondary | 0.29 | 0.23 | 0.36 |
|  | Tertiary | 0.26 | 0.21 | 0.34 |
| North west | None |  |  |  |
|  | Pry | 0.11 | 0.09 | 0.13 |
|  | Secondary | 0.08 | 0.07 | 0.1 |
|  | Tertiary | 0.08 | 0.06 | 0.1 |
| South East | None |  |  |  |
|  | Pry | 9.35 | 2.52 | 14.64 |
|  | Secondary | 15.35 | 5.12 | 20.11 |
|  | Tertiary | 9.82 | 8.66 | 15.52 |
| South-south | None |  |  |  |
|  | Pry | 5.86 | 0.36 | 3.86 |
|  | Secondary | 1.44 | 0.25 | 8.31 |
|  | Tertiary | 8.45 | 1.45 | 6.59 |
| South-west | None |  |  |  |
|  | Pry | 8.62 | 3.76 | 19.72 |
|  | Secondary | 15.67 | 6.89 | 35.64 |
|  | Tertiary | 17.01 | 7.44 | 38.88 |
| **Marital status base (Married)** |  |  |  |  |
| Divorced/widowed | None |  |  |  |
|  | Pry | 2.08 | 1.1 | 3.9 |
|  | Secondary | 3.93 | 2.16 | 7.15 |
|  | Tertiary | 3.47 | 1.84 | 6.56 |
| Single | None |  |  |  |
|  | Pry | 1.01 | 0.89 | 1.13 |
|  | Secondary | 3.22 | 2.89 | 3.6 |
|  | Tertiary | 1.78 | 1.57 | 2.03 |
| **Ethnicity base(Hausa)** |  |  |  |  |
| Igbo | None |  |  |  |
|  | Pry | 11.01 | 3.9 | 34.5 |
|  | Secondary | 3.99 | 1.7 | 10.01 |
|  | Tertiary | 23.3 | 8.04 | 791.7 |
| Yoruba | None |  |  |  |
|  | Pry | 26.79 | 13.74 | 52.22 |
|  | Secondary | 10.59 | 5.02 | 19.51 |
|  | Tertiary | 12.73 | 6.67 | 24.43 |
| Other ethnic group | None |  |  |  |
|  | Pry | 8.61 | 7.06 | 10.49 |
|  | Secondary | 20.65 | 17.04 | 25.03 |
|  | Tertiary | 16.86 | 13.7 | 20.75 |
| **Parity base(None)** |  |  |  |  |
| 1-2 | None |  |  |  |
|  | Pry | 1.1 | 0.92 | 1.32 |
|  | Secondary | 0.59 | 0.5 | 0.69 |
|  | Tertiary | 1.05 | 0.87 | 1.26 |
| 3-4 | None |  |  |  |
|  | Pry | 1.15 | 0.96 | 1.36 |
|  | Secondary | 0.42 | 0.36 | 0.5 |
|  | Tertiary | 0.75 | 0.63 | 0.9 |
| More than 4 | None |  |  |  |
|  | Pry | 0.88 | 0.77 | 1.01 |
|  | Secondary | 0.18 | 0.15 | 0.2 |
|  | Tertiary | 0.24 | 0.2 | 0.29 |
| **Alcohol base(yes)** |  |  |  |  |
| No | None |  |  |  |
|  | Pry | 0.03 | 0.02 | 0.04 |
|  | Secondary | 0.02 | 0.01 | 0.02 |
|  | Tertiary | 0.01 | 0.01 | 0.02 |
| **Smoke base(Yes)** | |  |  |  |
| No | None |  |  |  |
|  | Pry | 1.26 | 0.88 | 1.79 |
|  | Secondary | 1.26 | 0.91 | 1.73 |
|  | Tertiary | 0.76 | 0.54 | 1.07 |
| **Media exposure (yes)** |  |  |  |  |
| No | None |  |  |  |
|  | Pry | 0.49 | 0.38 | 0.63 |
|  | Secondary | 0.07 | 0.06 | 0.09 |
|  | Tertiary | 0.02 | 0.01 | 0.02 |

**Additional table 2: Selection bias (women)**

|  |  | **RRR** | **95% CI** | |
| --- | --- | --- | --- | --- |
| **Age Base( 15 - 20)** | **Level of Education** |  |  |  |
| 20_24 | None |  |  |  |
|  | Pry | 0.98 | 0.87 | 1.11 |
|  | Sec | 0.55 | 0.49 | 0.62 |
|  | Tertiary | 3.73 | 3.07 | 4.53 |
| 25_29 | None |  |  |  |
|  | Pry | 0.99 | 0.88 | 1.11 |
|  | Sec | 0.37 | 0.33 | 0.42 |
|  | Tertiary | 3.53 | 2.92 | 4.28 |
| 30_34 | None |  |  |  |
|  | Pry | 1.06 | 0.94 | 1.20 |
|  | Sec | 0.32 | 0.29 | 0.36 |
|  | Tertiary | 3.77 | 3.11 | 4.57 |
| 35_39 | None |  |  |  |
|  | Pry | 1.37 | 1.21 | 1.56 |
|  | Sec | 0.29 | 0.25 | 0.32 |
|  | Tertiary | 3.23 | 2.64 | 3.95 |
| 40_44 | None |  |  |  |
|  | Pry | 1.53 | 1.34 | 1.74 |
|  | Sec | 0.25 | 0.22 | 0.28 |
|  | Tertiary | 2.71 | 2.19 | 3.35 |
| 45_49 | None |  |  |  |
|  | Pry | 1.61 | 1.39 | 1.86 |
|  | Sec | 0.24 | 0.20 | 0.27 |
|  | Tertiary | 2.68 | 2.13 | 3.36 |
| **Residence (Urban)** |  | 1.00 |  |  |
| Rural | None |  |  |  |
|  | Pry | 0.79 | 0.72 | 0.87 |
|  | Sec | 0.21 | 0.19 | 0.23 |
|  | Tertiary | 0.08 | 0.08 | 0.09 |
| **Marital status (married)** |  | 1.00 |  |  |
| Single | None |  |  |  |
|  | Pry | 1.65 | 1.44 | 1.88 |
|  | Sec | 13.92 | 12.30 | 15.74 |
|  | Tertiary | 9.23 | 8.05 | 10.59 |
| Widow/divorced | None |  |  |  |
|  | Pry | 2.44 | 1.97 | 3.03 |
|  | Sec | 3.77 | 3.03 | 4.68 |
|  | Tertiary | 3.53 | 2.74 | 4.55 |
| **Wealth index (poor)** |  |  |  |  |
| Average | None |  |  |  |
|  | pry | 0.30 | 0.27 | 0.33 |
|  | Sec | 0.02 | 0.02 | 0.03 |
|  | Tertiary | 0.02 | 0.02 | 003 |
| Rich | No |  |  |  |
|  | Pry | 0.51 | 0.45 | 0.58 |
|  | Sec | 0.15 | 0.14 | 0.18 |
|  | Tertiary | 0.04 | 0.03 | 0.04 |
| **Ethnicity base(Hausa)** |  |  |  |  |
|  |  |  |  |  |
| Igbo | None |  |  |  |
|  | Pry | 36.71 | 22.99 | 58.63 |
|  | Sec | 2.79 | 1.61 | 4.60 |
|  | Tertiary | 3.74 | 2.01 | 6.62 |
| Yoruba | None |  |  |  |
|  | Pry | 67.53 | 36.17 | 126.07 |
|  | Sec | 4.02 | 2.36 | 7.64 |
|  | Tertiary | 8.47 | 4.98 | 15.70 |
| Other ethnic groups | None |  |  |  |
|  | Pry | 8.61 | 7.70 | 9.62 |
|  | Sec | 25.27 | 22.53 | 28.34 |
|  | Tertiary | 27.47 | 23.75 | 31.78 |
| **Parity Base (None)** |  |  |  |  |
| 1-2 | None |  |  |  |
|  | Pry | 0.88 | 0.79 | 1.00 |
|  | Sec | 0.28 | 0.25 | 0.31 |
|  | Tertiary | 0.39 | 0.35 | 0.45 |
| 3-4 | None |  |  |  |
|  | Pry | 0.98 | 0.87 | 1.10 |
|  | Secondary | 0.21 | 0.19 | 0.24 |
|  | Tertiary | 0.30 | 0.26 | 0.34 |
| 5-7 | None |  |  |  |
|  | Pry | 0.85 | 0.76 | 0.95 |
|  | Secondary | 0.08 | 0.07 | 0.09 |
|  | Tertiary | 0.08 | 0.07 | 0.09 |
| **Alcohol use base (Yes)** |  |  |  |  |
| No | None |  |  |  |
|  | Pry | 0.01 | 0.00 | 0.02 |
|  | Secondary | 0.00 | 0.00 | 0.01 |
|  | Tertiary | 0.00 | 0.00 | 0.01 |
| **Cigarette base (yes)** |  |  |  |  |
| No | None |  |  |  |
|  | Pry | 0.32 | 0.12 | 0.80 |
|  | Secondary | 0.29 | 0.12 | 0.73 |
|  | Tertiary | 0.15 | 0.06 | 0.38 |
| **Media use (Yes)** |  |  |  |  |
| No | None |  |  |  |
|  | Pry | 2.00 | 1.81 | 2.21 |
|  | Secondary | 10.11 | 9.20 | 11.11 |
|  | Tertiary | 27.37 | 24.32 | 30.80 |
